# Supplementary material for: Gender-Difference in Hair Length as Revealed by Crispr-Based Production of Long-Haired Mice with Dysfunctional FGF5 Mutations
Source: MDPI journal article supplement (doi:10.3390/ijms231911855), 2022-10-06
Supplement: s1 [file s1]

```

      1                                     60
      |                                     |
      B6 MSLSLLFLIFCSHLIHSAAHGEKRLTPEGQPAPPRNPGDSSGSRGRSSATFSSSSASSP
Fgf5go-malc.#1 MSLSLLFLIFCSHLIHSAAHGEKRLTPEGQPAPPRNPGDSSGSRGRSSATFSSSSASSP
Fgf5go-malc.#2 MSLSLLFLIFCSHLIHSAAHGEKRLTPEGQPAPPRNPGDSSGSRGRSSATFSSSSASSP
Fgf5malc MSLSLLFLIFCSHLIHSAAHGEKRLTPEGQPAPPRNPGDSSGSRGRSSATFSSSSASSP

      61                                     120
      |                                     |
      B6 VAASPGSQSGSGSEHSSFQWSPSGRRTGSLYCRVGIGFHLQIYPDGKVNGSHEASVLSILE
Fgf5go-malc.#1 VAASPGSQSGSGSEHSSFQWSPSGRRTGSLYCRVGIGFHLQIYPDGKVNGSHEASVLSILE
Fgf5go-malc.#2 VAASPGSQSGSGSEHSSFQWSPSGRRTGSLYCRVGIGFHLQIYPDGKVNGSHEASVLSILE
Fgf5malc VAASPGSQSGSGSEHSSFQWSPSGRRTGSLYCRVGIGFHLQIYPDGKVNGSHEASVLSILE

      121                                     180
      |                                     |
      B6 IFAVSQGIVGIRGVFSNKFLAMSKKGLHASAKFTDDCKFRERFQENSINTYASAIHRTE
Fgf5go-malc.#1 IFAVSQGIVGIRGVFSNKFLAMSKKGLHASAKFTDDCKFRERFQENSINTYASAIHRTE
Fgf5go-malc.#2 IFAVSQGIVGIRGVFSNKFLAMSKKGLHASAKFTDDCKFRERFQENSINTYASAIHRTE
Fgf5malc IFAVSQGIVGIRGVFSNKFLAMSKKGLHASAKFTDDCKFRERFQENSINTYASAIHRTE

      181                                     240
      |                                     |
      B6 KTGREWYVALNKRKAKRGCSPRVKPQHVSHTFLPRFKQSEQPELSFTVTVPKPPVK
Fgf5go-malc.#1 KTG-RVVRGPEQERESQERLQPTGQTPTRLHPLPTQVQAVRATGTFLHRHCSRKEKATGE
Fgf5go-malc.#2 KTGRRVVRGPEQERESQERLQPTGQTPTRLHPLPTQVQAVRATGTFLHRHCSRKEKATGE
Fgf5malc KTGGSQTWP*-----

      241                                     300
      |                                     |
      B6 PKVPLSQPRRSPSPVKYRLKFRFG*-----
Fgf5go-malc.#1 TKGAPVAASQKSQPSEVQTEVSLWMLVHPGLVGNNSLYRRHRSPEGNSDTASLCCAYTC
Fgf5go-malc.#2 TKGAPVAASQKSQPSEVQTEVSLWMLVHPGLVGNNSLYRRHRSPEGNSDTASLCCAYTC
Fgf5malc -----

      301
      |
      B6 -----
Fgf5go-malc.#1 GSQVILFREDWN*
Fgf5go-malc.#2 GSQVILFREDWN*
Fgf5malc -----

```
