# Supplementary material for: Gender-Difference in Hair Length as Revealed by Crispr-Based Production of Long-Haired Mice with Dysfunctional FGF5 Mutations
Source: Int J Mol Sci. 2022 Oct 6;23(19):11855. doi: 10.3390/ijms231911855 (PMC9569730; doi:10.3390/ijms231911855)
Supplement: Supplementary file 1 [file ijms-23-11855-s001.zip › Takahashi_et_al_Table_S1.xlsx]

## Sheet: Sheet1
	Table S1. Sequences of gRNA (A), and primers used for genotyping (B) and RT-PCR ©
	Experiments		Name	Sequence (5' to 3')	Product size (bp)
	A		Fgf5_cr_F	TAACCCACCCTGAACACACAC	592
			Fgf5_cr_R	AGAGTTGTTTCCCACAAGGC
	B		Fgf5_cr_F_v2	AAATGGTGTTGCAGAGGTAACTTAG	624
			Fgf5_cr_R	AGAGTTGTTTCCCACAAGGC
	C		Fgf5_RT_F	GCTGTGTCTCAGGGGATTGTA	663
			Fgf5_RT_R	GCCTTTATATCCTCGTGATCTG
			Fgf5s_RT_F*	GTGTTAAGCCAAATTTACG	237
			Fgf5s_RT_R	GTGAAGGAAAGTTCCGGTTG
			Fgf5s_qRT_F*	GTGTTAAGCCAAATTTACG	79
			Fgf5s_qRT_R	CGCGGACGCATAGGTATTA
			Gapdh_F	TTGCCATCAACGACCCCTTCATTGAC	829
			Gapdh_R	AAGTTGTCATTGAGAGCAATGCCAGCC
	*: These primers have identical nucleotide sequence since these were used for both semi-qRT-PCR and qRT-PCR.
