# Supplementary material for: Gender-Difference in Hair Length as Revealed by Crispr-Based Production of Long-Haired Mice with Dysfunctional FGF5 Mutations
Source: Int J Mol Sci. 2022 Oct 6;23(19):11855. doi: 10.3390/ijms231911855 (PMC9569730; doi:10.3390/ijms231911855)
Supplement: Supplementary file 1 [file ijms-23-11855-s001.zip › Takahashi_et_al_Table_S2.xlsx]

## Sheet: Sheet2
	Table S2. Putative offtarget genomic regions of guide RNA for Fgf5 genome-editing inferred from the crispor program (http://crispor.tefor.net/).
	mismatch Count	mitOfftarget Score	cfdOfftarget Score	Chr.	Position		strand	Locus Description
					start	end
	3	2.42672	0.433333	4	135642042	135642064	-	intron	Cnr2
	2	1.24893	0.0267094	11	65426215	65426237	+	intergenic	Gm12295-Map2k4
	3	0.79687	0.135385	5	4451475	4451497	-	intergenic	Mterf1b-Fzd1
	3	0.777733	0.0259259	4	73874650	73874672	-	intergenic	2310002L09Rik-Frmd3
	2	0.767308	0.07	11	107125287	107125309	-	exon	Pitpnc1
	3	0.694775	0.0361111	9	57791879	57791901	-	intergenic	Arid3b-Ubl7
	3	0.585833	0.20625	15	42447800	42447822	+	intron	Angpt1
	3	0.535952	0.0976331	9	62630011	62630033	-	intron	Itga11
	3	0.499142	0.791304	9	74619971	74619993	-	intergenic	Wdr72-Gm16551
	3	0.484148	0	2	122178744	122178766	-	intergenic	Duox1-Shf
	3	0.433286	0.15873	2	11852969	11852991	+	intergenic	Ankrd16-Itga8
	3	0.352133	0.112	8	99225421	99225443	+	intergenic	Got2-Gm15679
	3	0.3268	0.205128	2	89015245	89015267	+	intergenic	Olfr1225-Olfr1226
	3	0.29291	0	19	4197783	4197805	-	intergenic	Gpr152-Coro1b
	3	0.291941	0.0175439	15	76129490	76129512	+	intergenic	Parp10-Grina
	3	0.282329	0.0225694	9	43221993	43222015	-	intergenic	D630033O11Rik-Trim29
	3	0.25664	0	19	15465204	15465226	+	intergenic	Tle4-Psat1
	3	0.241706	0.00457516	4	130474044	130474066	-	intron	Pum1
	3	0.135745	0.0381971	4	41199961	41199983	+	intron	Ubap2
	3	0.0892427	0	14	111107699	111107721	+	intergenic	Slitrk6-Slitrk5
	3	0.0892427	0	4	24149635	24149657	-	intergenic	1700025O08Rik-Mms22l
	3	0.0807516	0	18	54380174	54380196	-	intergenic	Csnk1g3-Redrum
	3	0.0670065	0.123529	7	114368144	114368166	-	intron	Insc
	3	0.0645595	0.0555556	14	24398086	24398108	-	intergenic	E330034G19Rik-Polr3a
	3	0.0645595	0	8	19051266	19051288	+	intergenic	Defb37-Defb38
	3	0.0645595	0	X	150475541	150475563	-	intergenic	Phf8-Huwe1
	3	0.0645595	0	13	50048327	50048349	+	intergenic	Iars-Gm906
	3	0.0645595	0	13	51002707	51002729	-	intergenic	4930518P08Rik-9430083A17Rik
