# Supplementary figures and images for: Gender-Difference in Hair Length as Revealed by Crispr-Based Production of Long-Haired Mice with Dysfunctional FGF5 Mutations
Source: MDPI journal article supplement (doi:10.3390/ijms231911855), 2022-10-06

Male

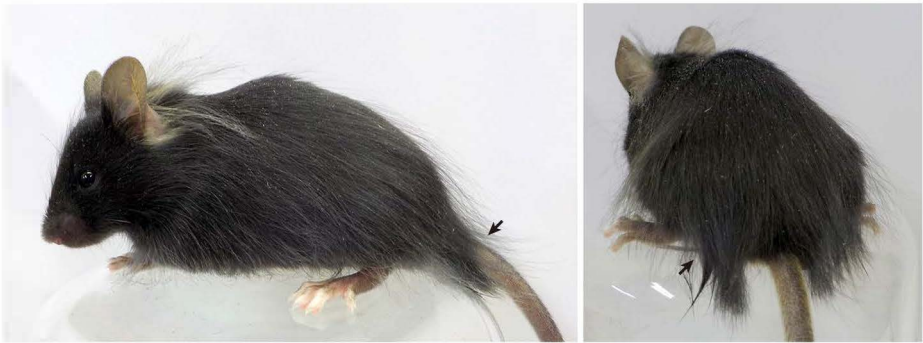

Female

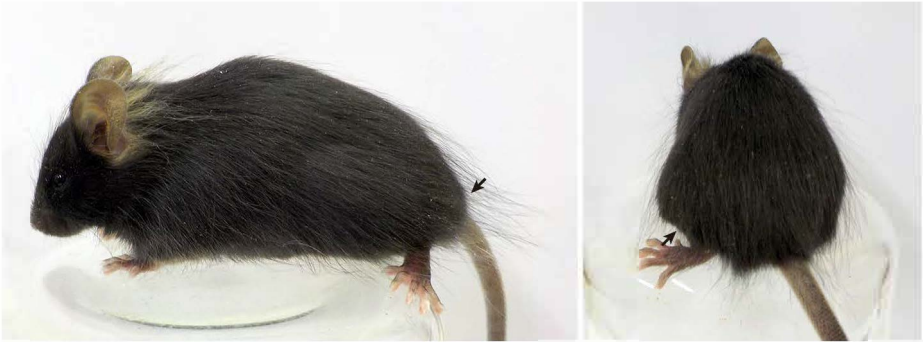

Supplement: s1 [file s1]
